# Supplementary material for: Interventions to Vaccinate Zero-Dose Children: A Narrative Review and Synthesis
Source: Preprints.org preprint supplement (doi:10.20944/preprints202308.2134.v1), 2023-08-31
Supplement: Supplementary file 1 [file supplementary]

**Supplementary Materials:**

Search Strategy

A search strategy was developed in PubMed to identify research articles on barriers to reach zero-dose children. “Zero-dose” was used as the key concept for the search and terms such as “DTP-1”,“undervaccinated” and “unvaccinated” were used as proxies for zero-dose children. Time period for the search strategy was limited to 2000-2021. A total of 1004 articles were extracted from PubMed for initial screening. After the initial screening and title and abstract review, 29 studies were selected for inclusion in this review.("child"[MeSH] OR child* OR "pediatrics"[MeSH] OR pediatric* OR paediatric*)AND(challenges OR barriers OR obstacles OR disparity OR inequity OR coverage)AND(vaccination OR vaccines OR immunization OR immunisation OR vaccin* OR immuniz* OR immunis*)AND("zero dose" OR "zero-dose" OR "DTP1" OR "DTP-1" OR "DPT1" OR "DPT-1" OR unvaccinated OR undervaccinated)AND(2000:2021[pdat])
